# Supplementary material
Source: ML conference proceedings conference paper supplement (https://openreview.net/forum?id=Ib6VSrtZcu9)
Supplement: supplementary_material [file attachment]

# Appendix

## Contents of Main Article and Appendix

|          |                                                                                |           |
|----------|--------------------------------------------------------------------------------|-----------|
| <b>1</b> | <b>Introduction</b>                                                            | <b>1</b>  |
| 1.1      | Further Related Work . . . . .                                                 | 2         |
| <b>2</b> | <b>Setting and Notation</b>                                                    | <b>2</b>  |
| <b>3</b> | <b>Conditional Posterior Sampling Algorithm</b>                                | <b>3</b>  |
| <b>4</b> | <b>Regret of Conditional Posterior Sampling</b>                                | <b>4</b>  |
| 4.1      | Decoupling Coefficient and its Relation to Other Complexity Measures . . . . . | 6         |
| 4.2      | Interpretation of Theorem 1 . . . . .                                          | 7         |
| <b>5</b> | <b>Proof Overview of Theorem 1</b>                                             | <b>8</b>  |
| <b>6</b> | <b>Conclusion</b>                                                              | <b>10</b> |
| <b>A</b> | <b>Full Proof of Theorem 1</b>                                                 | <b>14</b> |
| A.1      | Generalization of Theorem 1 . . . . .                                          | 14        |
| A.2      | Proof of Theorem 2 . . . . .                                                   | 15        |
| <b>B</b> | <b>Proofs for Decoupling Coefficient Bounds</b>                                | <b>22</b> |
| B.1      | Proof of Proposition 1 (Linear MDP) . . . . .                                  | 22        |
| B.2      | Proof of Proposition 2 (Generalized Linear Value Functions) . . . . .          | 22        |
| B.3      | Proof of Proposition 3 (Bellman-Eluder dimension Reduction) . . . . .          | 23        |

## A Full Proof of Theorem 1

### A.1 Generalization of Theorem 1

Instead of proving Theorem 1 directly, we will prove a slightly more general version that we will state formally in Theorem 2. In short, this version considers a more general family of posteriors that include an extra parameter  $\alpha \in (0, 1]$ . The original posterior of Algorithm 1 in Theorem 1 corresponds to the case of  $\alpha = 1$ .

First, we introduce some notations used in the proof. We define

$$\text{Reg}(f) = (V_1^*(x^1) - V_1^{\pi_f}(x^1)).$$

Given state action pair  $[x^h, a^h]$ , we use the notation  $[x^{h+1}, r^h] \sim P^h(\cdot|x^h, a^h)$  to denote the joint probability of sampling the next state  $x^{h+1} \sim P^h(\cdot|x^h, a^h)$  and reward  $r^h \sim R^h(\cdot|x^h, a^h)$ .

Let  $\zeta_s = \{[x_s^h, a_s^h, r_s^h]\}_{h \in [H]}$  be the trajectory of the  $s$ -th episode. In the following, the notation  $S_t$  at time  $t$  includes all historic observations up to time  $t$ , which include both  $\{\zeta_s\}_{s \in [t]}$  and  $\{f_s\}_{s \in [t]}$ . These observations are generated in the order  $f_1 \sim p_0(\cdot)$ ,  $\zeta_1 \sim \pi_{f_1}$ ,  $f_2 \sim p(\cdot|S_1)$ ,  $\zeta_2 \sim \pi_{f_2}, \dots$

Define the excess loss

$$\begin{aligned} \Delta L^h(f^h, f^{h+1}; \zeta_s) &= (f^h(x_s^h, a_s^h) - r_s^h - f^{h+1}(x_s^{h+1}))^2 \\ &\quad - (\mathcal{T}_h^* f^{h+1}(x_s^h, a_s^h) - r_s^h - f^{h+1}(x_s^{h+1}))^2, \end{aligned}$$

and define the potential  $\hat{\Phi}$ , which contains the extra parameter  $\alpha$ :

$$\begin{aligned} \hat{\Phi}_t^h(f) &= -\ln p_0^h(f^h) + \alpha \eta \sum_{s=1}^{t-1} \Delta L^h(f^h, f^{h+1}; \zeta_s) \\ &\quad + \alpha \ln \mathbb{E}_{\tilde{f}^h \sim p_0^h} \exp \left( -\eta \sum_{s=1}^{t-1} \Delta L^h(\tilde{f}^h, f^{h+1}; \zeta_s) \right), \end{aligned} \quad (10)$$

and define

$$\Delta f^1(x^1) = f^1(x^1) - Q_1^*(x^1),$$

where  $Q_1^*(x^1) = V_1^*(x^1)$  using our notation. Given  $S_{t-1}$ , we may define the following generalized posterior probability  $\hat{p}_t$  on  $\mathcal{F}$ :

$$\hat{p}_t(f) \propto \exp \left( -\sum_{h=1}^H \hat{\Phi}_t^h(f) + \lambda \Delta f^1(x^1) \right). \quad (11)$$

We will also introduce the following definition.

**Definition 8.** We define for  $\alpha \in (0, 1)$ , and  $\epsilon > 0$ :

$$\kappa^h(\alpha, \epsilon) = (1 - \alpha) \ln \mathbb{E}_{f^{h+1} \sim p_0^{h+1}} p_0^h \left( \mathcal{F}_h(\epsilon, f^{h+1}) \right)^{-\alpha/(1-\alpha)},$$

and we define  $\kappa^h(1, \epsilon) = \lim_{\alpha \rightarrow 1^-} \kappa^h(\alpha, \epsilon)$ .

It is easy to check when  $\alpha = 1$ , the posterior distribution of (11) is equivalent to the posterior  $p(f|S_{t-1})$  defined in (3).

When  $\alpha = 1$ ,

$$\kappa^h(1, \epsilon) = \sup_{f^{h+1} \in \mathcal{F}_{h+1}} \ln \frac{1}{p_0^h(\mathcal{F}_h(\epsilon, f^{h+1}))} < \infty.$$

Therefore  $\kappa(\epsilon)$  defined in Definition 1 can be written as

$$\kappa(\epsilon) = \sum_{h=1}^H \kappa^h(1, \epsilon).$$

However, the advantage of using a value  $\alpha < 1$  is that  $\kappa(\alpha, \epsilon)$  can be much smaller than  $\kappa(1, \epsilon)$ .

We will prove the following theorem for  $\alpha \in (0, 1)$ , which becomes Theorem 1 when  $\alpha \rightarrow 1$ .

**Theorem 2.** Consider Algorithm 1 with the posterior sampling probability (3) replaced by (11). When  $\eta b^2 \leq 0.4$ , we have

$$\begin{aligned} & \sum_{t=1}^T \mathbb{E}_{S_{t-1}} \mathbb{E}_{f_t \sim \hat{p}_t} \text{Reg}(f_t) \\ & \leq \frac{\lambda}{\alpha \eta} \text{dc}(\mathcal{F}, M, T, 0.25\alpha\eta/\lambda) + (T/\lambda) \sum_{h=1}^H \left[ \kappa^h(\alpha, \epsilon) - \ln p_0^h(\mathcal{F}_h(\epsilon, Q_{h+1}^*)) \right] \\ & \quad + \frac{\alpha}{\lambda} \eta \epsilon (5\epsilon + 2b) T(T-1)H + T\epsilon. \end{aligned}$$

## A.2 Proof of Theorem 2

We need a number of technical lemmas. We start with the following inequality, which is the basis of our analysis.

**Lemma 1.**

$$\mathbb{E}_{f \sim \hat{p}_t} \left( \sum_{h=1}^H \hat{\Phi}_t^h(f) - \lambda \Delta f^1(x^1) + \ln \hat{p}_t(f) \right) = \inf_p \mathbb{E}_{f \sim p(\cdot)} \left( \sum_{h=1}^H \hat{\Phi}_t^h(f) - \lambda \Delta f^1(x^1) + \ln p(f) \right).$$

*Proof.* This is a direct consequence of the well-known fact that (11) is the minimizer of the right hand side. This fact is equivalent to the fact that the KL-divergence of any  $p(\cdot)$  and  $\hat{p}_t$  is non-negative.  $\square$

We also have the following bound, which is needed to estimate the left hand side and right hand side of Lemma 1.

**Lemma 2.** For all function  $f \in \mathcal{F}$ , we have

$$\mathbb{E}_{[x_s^{h+1}, r_s^h] \sim P^h(\cdot | x_s^h, a_s^h)} \Delta L^h(f^h, f^{h+1}, \zeta_s) = (\mathcal{E}_h(f; x_s^h, a_s^h))^2.$$

Moreover, we have

$$\mathbb{E}_{[x_s^{h+1}, r_s^h] \sim P^h(\cdot | x_s^h, a_s^h)} \Delta L^h(f^h, f^{h+1}, \zeta_s)^2 \leq \frac{4b^2}{3} (\mathcal{E}_h(f; x_s^h, a_s^h))^2.$$

*Proof.* For notation simplicity, we introduce the random variable

$$Z = f^h(x_s^h, a_s^h) - r_s^h - f^{h+1}(x_s^{h+1}),$$

which depends on  $[x_s^{h+1}, r_s^h]$ , conditioned on  $[x_s^h, a_s^h]$ . The expectation  $\mathbb{E}$  over  $Z$  is with respect to the joint conditional probability  $P^h(\cdot | x_s^h, a_s^h)$ . Then

$$\mathbb{E}Z = \mathcal{E}_h(f; x_s^h, a_s^h),$$

and

$$\Delta L^h(f^h, f^{h+1}, \zeta_s) = Z^2 - (Z - \mathbb{E}Z)^2.$$

Since

$$\mathbb{E}[Z^2 - (Z - \mathbb{E}Z)^2] = (\mathbb{E}Z)^2,$$

we obtain

$$\mathbb{E}_{[x_s^{h+1}, r_s^h] \sim P^h(\cdot | x_s^h, a_s^h)} \Delta L^h(f^h, f^{h+1}, \zeta_s) = (\mathbb{E}Z)^2 = (\mathcal{E}_h(f; x_s^h, a_s^h))^2.$$

Also  $Z \in [-b, b-1]$  and  $\max Z - \min Z \leq b$  (when conditioned on  $[x_s^h, a_s^h]$ ). This implies that

$$\mathbb{E}(Z^2 - (Z - \mathbb{E}Z)^2)^2 = (\mathbb{E}Z)^2 [4\mathbb{E}Z^2 - 3(\mathbb{E}Z)^2] \leq \frac{4}{3} b^2 (\mathbb{E}Z)^2.$$

We note that the maximum of  $4\mathbb{E}Z^2 - 3(\mathbb{E}Z)^2$  is achieved with  $Z \in \{-b, 0\}$  and  $\mathbb{E}Z = -2b/3$ . This leads to the second desired inequality.  $\square$

The above lemma implies the following exponential moment estimate.

**Lemma 3.** *If  $\eta b^2 \leq 0.8$ , then for all function  $f \in \mathcal{F}$ , we have*

$$\begin{aligned} & \ln \mathbb{E}_{[x_s^{h+1}, r_s^h] \sim P^h(\cdot | x_s^h, a_s^h)} \exp \left( -\eta \Delta L^h(f^h, f^{h+1}, \zeta_s) \right) \\ & \leq \mathbb{E}_{[x_s^{h+1}, r_s^h] \sim P^h(\cdot | x_s^h, a_s^h)} \exp \left( -\eta \Delta L^h(f^h, f^{h+1}, \zeta_s) \right) - 1 \\ & \leq -0.25\eta(\mathcal{E}_h(f; x_s^h, a_s^h))^2. \end{aligned}$$

*Proof.* From  $\eta b^2 \leq 0.8$ , we know that

$$-\eta \Delta L^h(f^h, f^{h+1}, \zeta_s) \leq 0.8.$$

This implies that

$$\begin{aligned} & \exp \left( -\eta \Delta L^h(f^h, f^{h+1}, \zeta_s) \right) \\ & = 1 - \eta \Delta L^h(f^h, f^{h+1}, \zeta_s) + \eta^2 \psi \left( -\eta \Delta L^h(f^h, f^{h+1}, \zeta_s) \right) \Delta L^h(f^h, f^{h+1}, \zeta_s)^2 \\ & \leq 1 - \eta \Delta L^h(f^h, f^{h+1}, \zeta_s) + 0.67\eta^2 \Delta L^h(f^h, f^{h+1}, \zeta_s)^2 \end{aligned}$$

where we have used the fact that  $\psi(z) = (e^z - 1 - z)/z^2$  is an increasing function of  $z$ , and  $\psi(0.8) < 0.67$ . It follows from Lemma 2 that

$$\begin{aligned} & \ln \mathbb{E}_{[x_s^{h+1}, r_s^h] \sim P^h(\cdot | x_s^h, a_s^h)} \exp \left( -\eta \Delta L^h(f^h, f^{h+1}, \zeta_s) \right) \\ & \leq \mathbb{E}_{[x_s^{h+1}, r_s^h] \sim P^h(\cdot | x_s^h, a_s^h)} \exp \left( -\eta \Delta L^h(f^h, f^{h+1}, \zeta_s) \right) - 1 \\ & \leq \mathbb{E}_{[x_s^{h+1}, r_s^h] \sim P^h(\cdot | x_s^h, a_s^h)} \left[ -\eta \Delta L^h(f^h, f^{h+1}, \zeta_s) + 0.67\eta^2 \Delta L^h(f^h, f^{h+1}, \zeta_s)^2 \right] \\ & \leq -0.25\eta(\mathcal{E}_h(f; x_s^h, a_s^h))^2, \end{aligned}$$

where the first inequality is due to  $\ln z \leq z - 1$ . The last inequality used  $0.67(4\eta b^2/3) < 0.75$  and Lemma 2. This proves the desired bound.  $\square$

The following lemma upper bounds the right hand side of Lemma 1.

**Lemma 4.** *If  $\eta b^2 \leq 0.8$ , then*

$$\begin{aligned} & \inf_p \mathbb{E}_{S_{t-1}} \mathbb{E}_{f \sim p(\cdot)} \left[ \sum_{h=1}^H \hat{\Phi}_t^h(f) - \lambda \Delta f^1(x^1) + \ln p(f) \right] \\ & \leq \lambda \epsilon + 4\alpha\eta(t-1)H\epsilon^2 - \sum_{h=1}^H \ln p_0^h(\mathcal{F}_h(\epsilon, Q_{h+1}^*)). \end{aligned}$$

*Proof.* Consider any  $f \in \mathcal{F}$ . For any  $\tilde{f}^h \in \mathcal{F}_h$  that only depends on  $S_{s-1}$ , we obtain from Lemma 3:

$$\mathbb{E}_{\zeta_s} \exp \left( -\eta \Delta L^h(\tilde{f}^h, f^{h+1}, \zeta_s) \right) - 1 \leq -0.25\eta \mathbb{E}_{\zeta_s} (\tilde{f}^h(x, a) - \mathcal{T}_h^* f^{h+1}(x, a))^2 \leq 0. \quad (12)$$

Now, let

$$W_t^h = \mathbb{E}_{S_t} \mathbb{E}_{f \sim p(\cdot)} \ln \mathbb{E}_{\tilde{f}^h \sim p_0^h} \exp \left( -\eta \sum_{s=1}^t \Delta L^h(\tilde{f}^h, f^{h+1}, \zeta_s) \right),$$

then using the notation

$$\hat{q}_t^h(\tilde{f}^h | f^{h+1}, S_{t-1}) = \frac{\exp \left( -\eta \sum_{s=1}^{t-1} \Delta L^h(\tilde{f}^h, f^{h+1}, \zeta_s) \right)}{\mathbb{E}_{\tilde{f}^h \sim p_0^h} \exp \left( -\eta \sum_{s=1}^{t-1} \Delta L^h(\tilde{f}^h, f^{h+1}, \zeta_s) \right)},$$

we have

$$\begin{aligned} W_s^h - W_{s-1}^h &= \mathbb{E}_{S_s} \mathbb{E}_{f \sim p(\cdot)} \ln \mathbb{E}_{\tilde{f}^h \sim \hat{q}_s^h(\cdot | f^{h+1}, S_{s-1})} \exp \left( -\eta \Delta L^h(\tilde{f}^h, f^{h+1}, \zeta_s) \right) \\ &\leq \mathbb{E}_{S_s} \mathbb{E}_{f \sim p(\cdot)} \left( \mathbb{E}_{\tilde{f}^h \sim \hat{q}_s^h(\cdot | f^{h+1}, S_{s-1})} \exp \left( -\eta \Delta L^h(\tilde{f}^h, f^{h+1}, \zeta_s) \right) - 1 \right) \leq 0, \end{aligned}$$

where the first inequality is due to  $\ln z \leq z - 1$ , and the second inequality is from (12).

By noticing that  $W_0^h = 0$ , we obtain

$$W_t^h = W_0^h + \sum_{s=1}^t [W_s^h - W_{s-1}^h] \leq 0.$$

That is:

$$\mathbb{E}_{S_{t-1}} \mathbb{E}_{f \sim p(\cdot)} \ln \mathbb{E}_{\tilde{f}^h \sim p_0^h} \exp \left( -\eta \sum_{s=1}^{t-1} \Delta L^h(\tilde{f}^h, f^{h+1}, \zeta_s) \right) \leq 0. \quad (13)$$

This implies that for an arbitrary  $p(\cdot)$ :

$$\begin{aligned} &\mathbb{E}_{S_{t-1}} \mathbb{E}_{f \sim p(\cdot)} \left[ \sum_{h=1}^H \hat{\Phi}_t^h(f) - \lambda \Delta f^1(x^1) + \ln p(f) \right] \\ &= \mathbb{E}_{S_{t-1}} \mathbb{E}_{f \sim p(\cdot)} \left[ -\lambda \Delta f^1(x^1) + \alpha \eta \sum_{h=1}^H \sum_{s=1}^{t-1} \Delta L^h(f^h, f^{h+1}, \zeta_s) \right. \\ &\quad \left. + \alpha \sum_{h=1}^H \ln \mathbb{E}_{\tilde{f}^h \sim p_0^h} \exp \left( -\eta \sum_{s=1}^{t-1} \Delta L^h(\tilde{f}^h, f^{h+1}, \zeta_s) \right) + \ln \frac{p(f)}{p_0(f)} \right] \\ &\leq \mathbb{E}_{S_{t-1}} \mathbb{E}_{f \sim p(\cdot)} \left[ -\lambda \Delta f^1(x^1) + \sum_{h=1}^H \alpha \eta \sum_{s=1}^{t-1} (\mathcal{E}_h(f; x_s^h, a_s^h))^2 + \ln \frac{p(f)}{p_0(f)} \right], \end{aligned}$$

where in the derivation, the first equality used the definition of  $\hat{\Phi}_t^h(f)$  in (10); the second inequality used (13), and then used the first equality of Lemma 2 to bound the expectation of  $\Delta L(\cdot)$  by  $\mathcal{E}_h$ .

Note that if for all  $h$

$$f^h \in \mathcal{F}_h(\epsilon, Q_{h+1}^*),$$

then  $|f(x_s^h, a_s^h) - Q_h^*(x_s^h, a_s^h)| \leq \epsilon$ . Therefore using the Bellman equation, we know

$$|\mathcal{E}_h(f; x_s^h, a_s^h)| \leq |f(x_s^h, a_s^h) - Q_h^*(x_s^h, a_s^h)| + \sup |f(x_{s+1}^h) - Q_h^*(x_{s+1}^h)| \leq 2\epsilon.$$

Therefore

$$\sum_{h=1}^H \alpha \eta \sum_{s=1}^{t-1} (\mathcal{E}_h(f; x_s^h, a_s^h))^2 \leq 4\alpha \eta H(t-1)\epsilon^2.$$

By taking  $p(f) = p_0(f)I(f \in \mathcal{F}(\epsilon))/p_0(\mathcal{F}(\epsilon))$ , with  $\mathcal{F}(\epsilon) = \prod_h \mathcal{F}_h(\epsilon, Q_{h+1}^*)$ , we obtain the desired bound.  $\square$

The following lemma lower bounds the entropy term on the left hand side of Lemma 1.

**Lemma 5.** *We have*

$$\begin{aligned} \mathbb{E}_{f \sim \hat{p}_t(f)} \ln \hat{p}_t(f) &\geq \alpha \mathbb{E}_{f \sim \hat{p}_t} \ln \hat{p}_t(f) + (1 - \alpha) \mathbb{E}_{f \sim \hat{p}_t} \sum_{h=1}^H \ln \hat{p}_t(f^h) \\ &\geq \frac{\alpha}{2} \sum_{h=1}^H \mathbb{E}_{f \sim \hat{p}_t} \ln \hat{p}_t(f^h, f^{h+1}) \\ &\quad + (1 - 0.5\alpha) \mathbb{E}_{f \sim \hat{p}_t} \ln \hat{p}_t(f^1) + (1 - \alpha) \sum_{h=2}^H \mathbb{E}_{f \sim \hat{p}_t} \ln \hat{p}_t(f^h). \end{aligned}$$

*Proof.* The first bound follows from the following inequality

$$\mathbb{E}_{f \sim \hat{p}_t} \ln \frac{\hat{p}_t(f)}{\prod_{h=1}^H \hat{p}_t(f^h)} \geq 0,$$

which is equivalent to the known fact that mutual information is non-negative (or KL-divergence is non-negative). The second inequality is equivalent to

$$\mathbb{E}_{f \sim \hat{p}_t} \ln \hat{p}_t(f) \geq 0.5 \mathbb{E}_{f \sim \hat{p}_t} \ln \hat{p}_t(f^1) + 0.5 \sum_{h=1}^H \mathbb{E}_{f \sim \hat{p}_t} \ln \hat{p}_t(f^h, f^{h+1}). \quad (14)$$

To prove (14), we consider the following two inequalities:

$$0.5 \mathbb{E}_{f \sim \hat{p}_t} \ln \hat{p}_t(f) \geq 0.5 \sum_{h=1}^H \mathbb{E}_{f \sim \hat{p}_t} \ln \hat{p}_t(f^h, f^{h+1}) I(h \text{ is a odd number})$$

and

$$0.5 \mathbb{E}_{f \sim \hat{p}_t} \ln \hat{p}_t(f) \geq 0.5 \mathbb{E}_{f \sim \hat{p}_t} \ln \hat{p}_t(f^1) + 0.5 \sum_{h=1}^H \mathbb{E}_{f \sim \hat{p}_t} \ln \hat{p}_t(f^h, f^{h+1}) I(h \text{ is an even number}).$$

Both follow from the fact that mutual information is non-negative. By adding the above two inequalities, we obtain (14).  $\square$

We will use the following decomposition to lower bound the left hand side of Lemma 1.

**Lemma 6.**

$$\begin{aligned} & \mathbb{E}_{S_{t-1}} \mathbb{E}_{f \sim \hat{p}_t} \left( \sum_{h=1}^H \hat{\Phi}_t^h(f) - \lambda \Delta f^1(x^1) + \ln \hat{p}_t(f) \right) \\ & \geq \underbrace{\mathbb{E}_{S_{t-1}} \mathbb{E}_{f \sim \hat{p}_t} \left[ -\lambda \Delta f^1(x^1) + (1 - 0.5\alpha) \ln \frac{\hat{p}_t(f^1)}{p_0^1(f^1)} \right]}_A \\ & \quad + \underbrace{\sum_{h=1}^H 0.5\alpha \mathbb{E}_{S_{t-1}} \mathbb{E}_{f \sim \hat{p}_t} \left[ \eta \sum_{s=1}^{t-1} 2\Delta L^h(f^h, f^{h+1}, \zeta_s) + \ln \frac{\hat{p}_t(f^h, f^{h+1})}{p_0^h(f^h)p_0^{h+1}(f^{h+1})} \right]}_{B_h} \\ & \quad + \underbrace{\sum_{h=1}^H \mathbb{E}_{S_{t-1}} \mathbb{E}_{f \sim \hat{p}_t} \left[ \alpha \ln \mathbb{E}_{\tilde{f}^h \sim p_0^h} \exp \left( -\eta \sum_{s=1}^{t-1} \Delta L^h(\tilde{f}^h, f^{h+1}, \zeta_s) \right) + (1 - \alpha) \ln \frac{\hat{p}_t(f^{h+1})}{p_0^{h+1}(f^{h+1})} \right]}_{C_h}. \end{aligned}$$

*Proof.* We note from (10) that

$$\begin{aligned} \hat{\Phi}_t^h(f) &= -\ln p_0^h(f^h) + \alpha \eta \sum_{s=1}^{t-1} \Delta L^h(f^h, f^{h+1}, \zeta_s) \\ & \quad + \alpha \ln \mathbb{E}_{\tilde{f}^h \sim p_0^h} \exp \left( -\eta \sum_{s=1}^{t-1} \Delta L^h(\tilde{f}^h, f^{h+1}, \zeta_s) \right). \end{aligned}$$

Now we can simply apply the second inequality of Lemma 5.  $\square$

We have the following result for  $A$  in Lemma 6.

**Lemma 7.** *We have*

$$A \geq -\lambda \mathbb{E}_{S_{t-1}} \mathbb{E}_{f_t \sim \hat{p}_t(\cdot)} \Delta f_t^1(x^1).$$

*Proof.* This follows from the fact that the following KL-divergence is nonnegative:

$$\mathbb{E}_{f_t \sim \hat{p}_t} \ln \frac{\hat{p}_t(f_t^1)}{p_0^1(f_t^1)} \geq 0.$$

□

The following proposition is from [Zhang \[2005\]](#). The proof is included for completeness.

**Proposition 4.** For each fixed  $f \in \mathcal{F}$ , we define a random variable for all  $s$  and  $h$  as follows:

$$\begin{aligned} \xi_s^h(f^h, f^{h+1}, \zeta_s) &= -2\eta\Delta L^h(f^h, f^{h+1}, \zeta_s) \\ &\quad - \ln \mathbb{E}_{[x_s^{h+1}, r_s^h] \sim P^h(\cdot | x_s^h, a_s^h)} \exp\left(-2\eta\Delta L^h(f^h, f^{h+1}, \zeta_s)\right). \end{aligned}$$

Then for all  $h$ :

$$\mathbb{E}_{S_{t-1}} \exp\left(\sum_{s=1}^{t-1} \xi_s^h(f^h, f^{h+1}, \zeta_s)\right) = 1.$$

*Proof.* We can prove the proposition by induction. Assume that the equation

$$\mathbb{E}_{S_{t'-1}} \exp\left(\sum_{s=1}^{t'-1} \xi_s^h(f^h, f^{h+1}, \zeta_s)\right) = 1$$

holds for some  $1 \leq t' < t$ . Then

$$\begin{aligned} &\mathbb{E}_{S_{t'}} \exp\left(\sum_{s=1}^{t'} \xi_s^h(f^h, f^{h+1}, \zeta_s)\right) \\ &= \mathbb{E}_{S_{t'-1}} \exp\left(\sum_{s=1}^{t'-1} \xi_s^h(f^h, f^{h+1}, \zeta_s)\right) \mathbb{E}_{f_{t'} \sim p(\cdot | S_{t'-1})} \cdot \mathbb{E}_{\zeta_{t'} \sim \pi_{f_{t'}}} \exp\left(\xi_{t'}^h(f^h, f^{h+1}, \zeta_{t'})\right) \\ &= \mathbb{E}_{S_{t'-1}} \exp\left(\sum_{s=1}^{t'-1} \xi_s^h(f^h, f^{h+1}, \zeta_s)\right) = 1. \end{aligned}$$

Note that in the derivation, we have used the fact that

$$\mathbb{E}_{\zeta_{t'} \sim \pi_{f_{t'}}} \exp\left(\xi_{t'}^h(f^h, f^{h+1}, \zeta_{t'})\right) = 1.$$

The desired result now follows from induction. □

The following lemma bounds  $B_h$  in Lemma 6. This is a key estimate in our analysis.

**Lemma 8.** Assume  $\eta b^2 \leq 0.4$ , then

$$B_h \geq 0.25\alpha\eta \sum_{s=1}^{t-1} \mathbb{E}_{S_{t-1}} \mathbb{E}_{f \sim \hat{p}_t} \mathbb{E}_{\pi_{f_s}} (\mathcal{E}_h(f; x_s^h, a_s^h))^2.$$

*Proof.* Given any fixed  $f \in \mathcal{F}$ , we consider the random variable  $\xi_s^h$  in Proposition 4.

It follows that

$$\begin{aligned} &\mathbb{E}_{f \sim \hat{p}_t} \left[ \sum_{s=1}^{t-1} -\xi_s^h(f^h, f^{h+1}, \zeta_s) + \ln \frac{\hat{p}_t(f^h, f^{h+1})}{p_0^h(f^h)p_0^{h+1}(f^{h+1})} \right] \\ &\geq \inf_p \mathbb{E}_{f \sim p} \left[ \sum_{s=1}^{t-1} -\xi_s^h(f^h, f^{h+1}, \zeta_s) + \ln \frac{p(f^h, f^{h+1})}{p_0^h(f^h)p_0^{h+1}(f^{h+1})} \right] \\ &= -\ln \mathbb{E}_{f^h \sim p_0^h} \mathbb{E}_{f^{h+1} \sim p_0^{h+1}} \exp\left(\sum_{s=1}^{t-1} \xi_s^h(f^h, f^{h+1}, \zeta_s)\right), \end{aligned}$$

In the above derivation, the last equation used the fact that the minimum over  $p$  is achieved at

$$p(f^h, f^{h+1}) \propto p_0^h(f^h)p_0^{h+1}(f^{h+1}) \exp\left(\sum_{s=1}^{t-1} \xi_s^h(f^h, f^{h+1}, \zeta_s)\right).$$

This implies that

$$\begin{aligned} & \mathbb{E}_{S_{t-1}} \mathbb{E}_{f \sim \hat{p}_t} \left[ \sum_{s=1}^{t-1} -\xi_s^h(f^h, f^{h+1}, \zeta_s) + \ln \frac{\hat{p}_t(f^h, f^{h+1})}{p_0^h(f^h)p_0^{h+1}(f^{h+1})} \right] \\ & \geq -\mathbb{E}_{S_{t-1}} \ln \mathbb{E}_{f^h \sim p_0^h} \mathbb{E}_{f^{h+1} \sim p_0^{h+1}} \exp\left(\sum_{s=1}^{t-1} \xi_s^h(f^h, f^{h+1}, \zeta_s)\right) \\ & \geq -\ln \mathbb{E}_{f^h \sim p_0^h} \mathbb{E}_{f^{h+1} \sim p_0^{h+1}} \mathbb{E}_{S_{t-1}} \exp\left(\sum_{s=1}^{t-1} \xi_s^h(f^h, f^{h+1}, \zeta_s)\right) = 0. \end{aligned}$$

The derivation used the concavity of log and Proposition 4. Now in the definition of  $\xi_s^h(\cdot)$ , We can use Lemma 3 to obtain the bound

$$\ln \mathbb{E}_{[x_s^{h+1}, r_s^h] \sim P^h(\cdot | x_s^h, a_s^h)} \exp\left(-2\eta \Delta L^h(f^h, f^{h+1}, \zeta_s)\right) \leq -0.5\eta(\mathcal{E}_h(f; x_s^h, a_s^h))^2,$$

which implies the desired result.  $\square$

The following lemma bounds  $C_h$  in Lemma 6.

**Lemma 9.** *We have for all  $h \geq 1$ :*

$$C_h \geq -(1-\alpha) \mathbb{E}_{S_{t-1}} \ln \mathbb{E}_{f^{h+1} \sim p_0^{h+1}} \left( \mathbb{E}_{f^h \sim p_0^h} \exp\left(-\eta \sum_{s=1}^{t-1} \Delta L^h(f^h, f^{h+1}, \zeta_s)\right) \right)^{-\alpha/(1-\alpha)}.$$

*Proof.* We have

$$\begin{aligned} & \mathbb{E}_{f \sim \hat{p}_t} \left[ \alpha \ln \mathbb{E}_{\tilde{f}^h \sim p_0^h} \exp\left(-\eta \sum_{s=1}^{t-1} \Delta L^h(\tilde{f}^h, f^{h+1}, \zeta_s)\right) + (1-\alpha) \ln \frac{\hat{p}_t(f^h, f^{h+1})}{p_0^h(f^h)p_0^{h+1}(f^{h+1})} \right] \\ & \geq (1-\alpha) \inf_{p^h} \mathbb{E}_{f \sim p^h} \left[ \frac{\alpha}{1-\alpha} \ln \mathbb{E}_{\tilde{f}^h \sim p_0^h} \exp\left(-\eta \sum_{s=1}^{t-1} \Delta L^h(\tilde{f}^h, f^{h+1}, \zeta_s)\right) + \ln \frac{p^h(f^h, f^{h+1})}{p_0^h(f^h)p_0^{h+1}(f^{h+1})} \right] \\ & = -(1-\alpha) \ln \mathbb{E}_{f^{h+1} \sim p_0^{h+1}} \left( \mathbb{E}_{f^h \sim p_0^h} \exp\left(-\eta \sum_{s=1}^{t-1} \Delta L^h(f^h, f^{h+1}, \zeta_s)\right) \right)^{-\alpha/(1-\alpha)}, \end{aligned}$$

where the inf over  $p^h$  is achieved at

$$p^h(f^h, f^{h+1}) \propto p_0^h(f^h)p_0^{h+1}(f^{h+1}) \left( \mathbb{E}_{f^h \sim p_0^h} \exp\left(-\eta \sum_{s=1}^{t-1} \Delta L^h(f^h, f^{h+1}, \zeta_s)\right) \right)^{-\alpha/(1-\alpha)}.$$

This leads to the lemma.  $\square$

The above bound implies the following estimate of  $C_h$  in Lemma 6, which is easier to interpret.

**Lemma 10.** *For all  $h \geq 1$ ,*

$$C_h \geq -\alpha\eta\epsilon(2b+\epsilon)(t-1) - \kappa^h(\alpha, \epsilon).$$

*Proof.* For  $f^h \in \mathcal{F}_h(\epsilon, f^{h+1})$ , we have

$$|\Delta L^h(f^h, f^{h+1}, \zeta_s)| \leq (\mathcal{E}_h(f, x_s^h, a_s^h))^2 + 2b|\mathcal{E}_h(f, x_s^h, a_s^h)| \leq \epsilon(2b+\epsilon).$$

It follows that

$$\mathbb{E}_{f^h \sim p_0^h} \exp\left(-\eta \sum_{s=1}^{t-1} \Delta L^h(f^h, f^{h+1}, \zeta_s)\right) \geq p_0^h(\mathcal{F}_h(\epsilon, f^{h+1})) \exp\left(-\eta(t-1)(2b+\epsilon)\epsilon\right).$$

This implies the bound.  $\square$



The following result, referred to as the value-function error decomposition in Jiang et al. [2017], is well-known.

**Proposition 5 (Jiang et al. [2017]).** *Given any  $f_t$ . Let  $\zeta_t = \{[x_t^h, a_t^h, r_t^h]\}_{h \in [H]} \sim \pi_{f_t}$  be the trajectory of the greedy policy  $\pi_{f_t}$ , we have*

$$\text{Reg}(f_t) = \mathbb{E}_{\zeta_t \sim \pi_{f_t}} \sum_{h=1}^H \mathcal{E}_h(f_t, x_t^h, a_t^h) - \Delta f^1(x^1).$$

Equipped with all technical results above, we are ready to state the assemble all parts in the proof of Theorem 2:

*Proof of Theorem 2.* Let

$$\delta_t^h = \lambda \mathcal{E}_h(f_t, x_t^h, a_t^h) - 0.25\alpha\eta \sum_{s=1}^{t-1} \mathbb{E}_{\pi_s} \left( \mathcal{E}_h(f_t, x_s^h, a_s^h) \right)^2.$$

Then from the definition of decoupling coefficient, we obtain

$$\sum_{t=1}^T \mathbb{E}_{S_{t-1}} \mathbb{E}_{f_t \sim \hat{p}_t} \mathbb{E}_{\zeta_t \sim \pi_{f_t}} \sum_{h=1}^H \delta_t^h \leq \frac{\lambda^2}{\alpha\eta} \text{dc}(\mathcal{F}, M, T, 0.25\alpha\eta/\lambda). \quad (15)$$

From Proposition 5, we obtain

$$\begin{aligned} & \mathbb{E}_{S_{t-1}} \mathbb{E}_{f_t \sim \hat{p}_t} \lambda \text{Reg}(f_t) - \mathbb{E}_{S_{t-1}} \mathbb{E}_{f_t \sim \hat{p}_t} \mathbb{E}_{\zeta_t \sim \pi_{f_t}} \sum_{h=1}^H \delta_t^h \\ &= -\lambda \mathbb{E}_{S_{t-1}} \mathbb{E}_{f_t \sim \hat{p}_t} \Delta f_t^1(x_t^1) + 0.25\alpha\eta \sum_{h=1}^H \sum_{s=1}^{t-1} \mathbb{E}_{S_{t-1}} \mathbb{E}_{f_t \sim \hat{p}_t} \mathbb{E}_{\pi_{f_s}} \left( \mathcal{E}_h(f_t, x_s^h, a_s^h) \right)^2 \\ &\leq \mathbb{E}_{S_{t-1}} \mathbb{E}_{f \sim \hat{p}_t} \left( \sum_{h=1}^H \hat{\Phi}_t^h(f) - \lambda \Delta f^1(x^1) + \ln \hat{p}_t(f) \right) + \alpha\eta\epsilon(2b + \epsilon)(t-1)H + \sum_{h=1}^H \kappa^h(\alpha, \epsilon) \\ &= \mathbb{E}_{S_{t-1}} \inf_p \mathbb{E}_{f \sim p} \left( \sum_{h=1}^H \hat{\Phi}_t^h(f) - \lambda \Delta f^1(x^1) + \ln p(f) \right) \\ &\quad + \alpha\eta\epsilon(2b + \epsilon)(t-1)H + \sum_{h=1}^H \kappa^h(\alpha, \epsilon) \\ &\leq \lambda\epsilon + \alpha\eta\epsilon(\epsilon + 4\epsilon + 2b)(t-1)H - \sum_{h=1}^H \ln p_0^h(\mathcal{F}(\epsilon, Q_{h+1}^*)) + \sum_{h=1}^H \kappa^h(\alpha, \epsilon). \end{aligned}$$

The first equality used the definition of  $\delta_t^h$ . The first inequality used Lemma 6 and Lemma 7 and Lemma 8 and Lemma 10. The second equality used Lemma 1. The second inequality follows from Lemma 4.

By summing over  $t = 1$  to  $t = T$ , and use (15), we obtain the desired bound.  $\square$

We are now ready to prove Theorem 1. Note that

$$-\ln p_0^h(\mathcal{F}(\epsilon, Q_{h+1}^*)) \leq \kappa^h(1, \epsilon),$$

we have

$$-\sum_{h=1}^H \ln p_0^h(\mathcal{F}(\epsilon, Q_{h+1}^*)) + \sum_{h=1}^H \kappa^h(\alpha, \epsilon) \leq 2\kappa(\epsilon).$$

By taking  $\epsilon = b/T^\beta$ , we obtain the desired result.

## B Proofs for Decoupling Coefficient Bounds

### B.1 Proof of Proposition 1 (Linear MDP)

*Proof of Proposition 1.* Completeness follows from the fact that the  $Q$  function of any policy  $\pi$  is linear for linear MDPs. This follows directly from the Bellman equation.

$$\begin{aligned} Q_h^\pi(x, a) &= r^h(x, a) + \mathbb{E}_{x' \sim P^h} [V_{h+1}^\pi(x')] = \langle \phi(x, a), \theta_h \rangle + \int_{\mathcal{S}} V_{h+1}^\pi(x') \langle \phi(x, a), d\mu_h(x') \rangle \\ &= \langle \phi(x, a), w_h^\pi \rangle, \end{aligned}$$

where  $w_h^\pi = \theta_h + \int_{\mathcal{S}} V_{h+1}^\pi(x') d\mu_h(x')$ . Hence the optimal  $Q$ -function is in the function class.

Boundedness follows from  $\|\phi(x, a)\| \leq 1$  and  $\|f\| \leq (H+1)\sqrt{d}$ .

Completeness follows by

$$\begin{aligned} [\mathcal{T}_h^* f^{h+1}](x, a) &= r^h(x, a) + \mathbb{E}_{x' \sim P^h} [\max_{a' \in \mathcal{A}} f^{h+1}(x', a')] \\ &= \langle \phi(x, a), \theta_h \rangle + \int_{\mathcal{S}} \max_{a' \in \mathcal{A}} f^{h+1}(x', a') \langle \phi(x, a), d\mu_h(x') \rangle = \langle \phi(x, a), v_h^\pi \rangle, \end{aligned}$$

where  $v_h^\pi = \theta_h + \int_{\mathcal{S}} \max_{a' \in \mathcal{A}} f^{h+1}(x', a') d\mu_h(x')$ .

**Bounding the decoupling coefficient.** By the same argument, the Bellman error is linear

$$\mathcal{E}_h(f; x, a) = \langle \phi(x, a), w^h(f) \rangle$$

for some  $w^h(f) \in \mathbb{R}^d$ ,  $\|w^h(f)\| \leq \sqrt{d}H$ . Denote  $\phi_s^h = \mathbb{E}_{\pi_{f_s}}[\phi(x^h, a^h)]$  and  $\Phi_t^h = \lambda I + \sum_{s=1}^t \phi(x^h, a^h)\phi(x^h, a^h)^\top$ .

$$\begin{aligned} &\mathbb{E}_{\pi_{f_t}}[\mathcal{E}_h(f_t; x_t^h, a_t^h)] - \mu \sum_{s=1}^{t-1} \mathbb{E}_{\pi_{f_s}}[\mathcal{E}_h(f_t; x_s^h, a_s^h)^2] \\ &= w^h(f_t)^\top \phi_t^h - \mu w^h(f_t)^\top \sum_{s=1}^{t-1} \mathbb{E}_{\pi_{f_s}}[\phi(x^h, a^h)\phi(x^h, a^h)^\top] w^h(f_t) \\ &\leq w^h(f_t)^\top \phi_t^h - \mu w^h(f_t)^\top \Phi_{t-1}^h w^h(f_t) + \mu \lambda d H^2 \\ &\leq \frac{1}{4\mu} (\phi_t^h)^\top (\Phi_{t-1}^h)^{-1} \phi_t^h + \mu \lambda d H^2, \end{aligned}$$

where the first inequality uses Jensen's inequality and the second is GM-AM inequality. Summing over all terms yields

$$\begin{aligned} &\sum_{t=1}^T \sum_{h=1}^H \left[ \mathbb{E}_{\pi_{f_t}}[\mathcal{E}_h(f_t; x_t^h, a_t^h)] - \mu \sum_{s=1}^{t-1} \mathbb{E}_{\pi_{f_s}}[\mathcal{E}_h(f_t; x_s^h, a_s^h)^2] \right] \\ &\leq \sum_{h=1}^H \left[ \frac{\ln(\det(\Phi_T^h)) - d \ln(\lambda)}{4\mu} + \lambda \mu C_1 T \right] \\ &\leq H \left( \frac{d \ln(\lambda + T/d) - d \ln(\lambda)}{4\mu} + \lambda \mu d H^2 T \right). \end{aligned}$$

Setting  $\lambda = \min\{1, \frac{1}{4\mu^2 H^2 T}\}$  finishes the proof.  $\square$

### B.2 Proof of Proposition 2 (Generalized Linear Value Functions)

*Proof of Proposition 2.* We assume w.l.o.g. that  $k \leq 1 \leq K$ , otherwise we can scale the features and the link function accordingly. By completeness assumption, there exists a  $g_t^h \in \mathcal{F}_h$ , such that  $g_t^h = \mathcal{T}_h^*(f_t^{h+1})$ . The Bellman error is

$$\mathcal{E}_h(f; x, a) = \sigma(\langle \phi(x, a), f_t^h \rangle - \mathcal{E}_h(f; x, a)) = \sigma(\langle \phi(x, a), g_t^h \rangle).$$

By the Lipschitz property, we have for all  $s \in [t]$

$$k|\langle \phi(x, a), w(f_s) \rangle| \leq |\mathcal{E}_h(f_s; x, a)| \leq K|\langle \phi(x, a), w^h(f_s) \rangle|$$

for  $w^h(f_s) = f_s^h - g_s^h \in \mathbb{R}^d$ .

The remaining proof is analogous to the previous one. Denote  $\phi_s^h = \mathbb{E}_{\pi_{f_s}}[\phi(x^h, a^h)]$  and  $\Phi_t^h = \lambda I + \sum_{s=1}^t \phi(x^h, a^h)\phi(x^h, a^h)^\top$ .

$$\begin{aligned} & \mathbb{E}_{\pi_{f_t}}[\mathcal{E}_h(f_t; x_t^h, a_t^h)] - \mu \sum_{s=1}^{t-1} \mathbb{E}_{\pi_{f_s}}[\mathcal{E}_h(f_t; x_s^h, a_s^h)^2] \\ & \leq K|w^h(f_t)^\top \phi_t^h| - \mu k^2 w^h(f_t)^\top \sum_{s=1}^{t-1} \mathbb{E}_{\pi_{f_s}}[\phi(x^h, a^h)\phi(x^h, a^h)^\top] w^h(f_t) \\ & \leq K|w^h(f_t)^\top \phi_t^h| - \mu k^2 w^h(f_t)^\top \Phi_{t-1}^h w^h(f_t) + \lambda \mu k^2 d H^2 \\ & \leq \frac{K^2}{4\mu k^2} (\phi_t^h)^\top (\Phi_{t-1}^h)^{-1} \phi_t^h + \mu k^2 \lambda d H^2, \end{aligned}$$

where the first inequality uses Jensen's inequality and the second is GM-AM inequality. Summing over all terms yields

$$\begin{aligned} & \sum_{t=1}^T \sum_{h=1}^H \left[ \mathbb{E}_{\pi_{f_t}}[\mathcal{E}_h(f_t; x_t^h, a_t^h)] - \mu \sum_{s=1}^{t-1} \mathbb{E}_{\pi_{f_s}}[\mathcal{E}_h(f_t; x_s^h, a_s^h)^2] \right] \\ & \leq \sum_{h=1}^H K^2 \left[ \frac{\ln(\det(\Phi_T^h)) - d \ln(\lambda)}{4\mu k^2} + \lambda \mu k^2 C_1 T \right] \\ & \leq H K^2 \left( \frac{d \ln(\lambda + T/d) - d \ln(\lambda)}{4\mu k^2} + \lambda \mu k^2 d H^2 T \right). \end{aligned}$$

Setting  $\lambda = \min\{1, \frac{1}{4\mu^2 k^2 H^2 T}\}$  finishes the proof.  $\square$

### B.3 Proof of Proposition 3 (Bellman-Eluder dimension Reduction)

We require the following Lemma to prove the reduction of Bellman-Eluder dimension to the decoupling coefficient.

**Lemma 11.** *Let  $\mu_1, \mu_2, \dots, \mu_{t-1}$  denote the measures over  $S \times A$  obtained by following the policy induced by  $(f_s)_{s=1}^{t-1}$  at stage  $h$  and  $\{\nu_1, \dots, \nu_M\}$  be the set of unique measures in this set in decreasing order of occurrences and let  $(N_i)_{i=1}^M$  be the number of times a measure appears in the sequence. If the  $\varepsilon$ -Bellman-Eluder Dimension is  $E$  and  $|\mathbb{E}_{x, a \sim \mu_s}[\mathcal{E}_h(f_t; x, a)]| > \varepsilon$ , then*

$$\begin{aligned} & \sum_{s=1}^{t-1} \mathbb{E}_{x, a \sim \mu_s}[\mathcal{E}_h(f_t; x, a)^2] \geq w_t^h (\mathbb{E}_{x, a \sim \mu_t}[\mathcal{E}_h(f_t; x, a)])^2 \\ & \text{where } w_t^h = \begin{cases} N_i & \text{if } \mu_t = \nu_i \wedge i \in [E-1] \\ \lceil \frac{\sum_{i=E}^M N_i}{E} \rceil & \text{otherwise.} \end{cases} \end{aligned}$$

*Proof.* If  $\mu_t = \nu_i$ , then the statement follows from Jensen's inequality. Otherwise by the Bellman-Eluder dimension, for any set  $(\mu'_i)_{i=1}^E$  of pairwise different measures, it holds that

$$\sum_{i=1}^E \mathbb{E}_{x, a \sim \mu'_i}[\mathcal{E}_h(f_t; x, a)^2] \geq (\mathbb{E}_{x, a \sim \mu_t}[\mathcal{E}_h(f_t; x, a)])^2.$$

It remains to show that we can construct at least  $\lceil \frac{\sum_{i=E}^M N_i}{E} \rceil$  sets of  $E$  pairwise different measures. This follows trivially by selecting sets greedily from the largest remaining duplicates of measures.  $\square$

Equipped with this lemma, we can now present the proof of Proposition 3:

*Proof of Proposition 3.* Denote  $\epsilon_{t,s}^h = \mathbb{E}_{[x_s^h, a_s^h]}[\mathcal{E}_h(f_t; x, a)]$ , the LHS is

$$\sum_{t=1}^T \sum_{h=1}^H \epsilon_{tt}^h \leq EH + \epsilon TH + \sum_{t=E+1}^T \sum_{h=1}^H \epsilon_{tt}^h \mathbb{I}\{\epsilon_{tt}^h > \epsilon\}.$$

For any  $h \in [H]$ , the RHS is bounded by Jensen's inequality, AM-GM inequality and Cauchy-Schwarz

$$\begin{aligned} \mu \sum_{t=1}^T \sum_{s=1}^{t-1} \epsilon_{ts}^h + \frac{2E(1 + \ln(T))}{4\mu} &\geq \sqrt{2E(1 + \ln(T)) \sum_{t=E+1}^T w_t^h \epsilon_{tt}^h{}^2 \mathbb{I}\{\epsilon_{tt}^h > \epsilon\}} \\ &\geq \sqrt{\frac{2E(1 + \ln(T))}{\sum_{t=E+1}^T \frac{1}{w_t^h}}} \sum_{t=E+1}^T \epsilon_{tt}^h \mathbb{I}\{\epsilon_{tt}^h > \epsilon\}. \end{aligned}$$

Finally we need to bound the sum of weights  $\sum_{t=1}^T \frac{1}{w_t^h}$ , which are defined in Lemma 11. Every time the measure  $\mu_t$  is in the set of the  $E - 1$  most common measures, one of the counts  $N_i$  for  $i \in [E - 1]$  increases. Otherwise the count  $\sum_{i \geq E} N_i$  increases by 1. Hence

$$\sum_{t=1}^T \frac{1}{w_t^h} \leq \sum_{i=1}^{E-1} \sum_{t=1}^T \frac{1}{t} + \sum_{t=1}^T \frac{E}{t} \leq 2E(1 + \ln(T)).$$

□
